# Supplementary material for: Synthesis of the spiroimine fragment of portimines A and B
Source: Royal Society of Chemistry journal article supplement (doi:10.1039/d3ob00998j), 2023-01-01
Supplement: d3ob00998j1.pdf [file d3ob00998j1.pdf]

*Supporting Information*

**Synthesis of the spiroimine fragment of portimines A and B**

Xiao-Bo Ding,<sup>a,b</sup> Alexander Wung,<sup>a</sup> Daniel P. Furkert,<sup>a,b</sup> Margaret A. Brimble\*,<sup>a,b</sup>

<sup>a</sup> School of Chemical Sciences, The University of Auckland, 23 Symonds Street, Auckland, 1010, New Zealand

<sup>b</sup> The Maurice Wilkins Centre for Molecular Biodiscovery, The University of Auckland, 3 Symonds Street, Auckland, 1010, New Zealand

|                                                                             |    |
|-----------------------------------------------------------------------------|----|
| 1. Attempted functionalization of terminal alkene <b>13</b>                 | S2 |
| 2. Reduction of the olefin of nitroalkene <b>15</b>                         | S3 |
| 3. Optimisation of conditions for enzymatic resolution of alcohol <b>11</b> | S4 |
| 4. HPLC spectra                                                             | S4 |
| 5. X-ray crystallographic data for (+)- <b>11</b>                           | S6 |
| 6. NMR spectra                                                              | S8 |

# 1. Failed trials on functionalization of terminal alkene **13**.

## A. Hydrozirconation/amination <sup>1</sup>

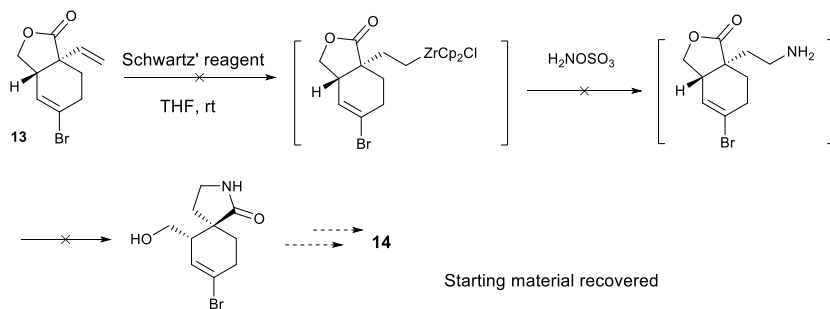

## B. Brown's hydroboration/amination <sup>2</sup>

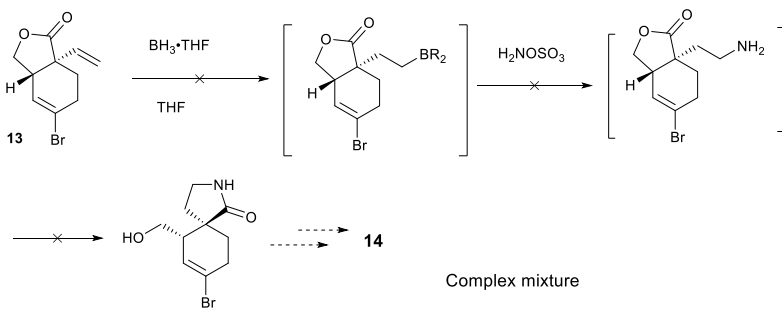

## C. Hydroboration/oxidation

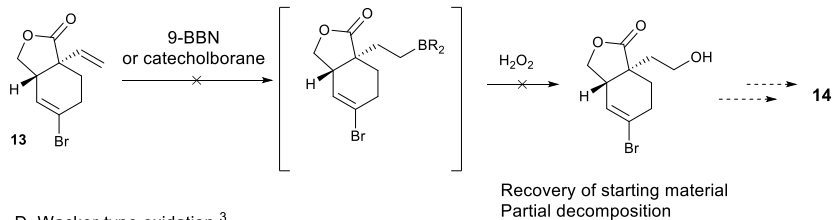

## D. Wacker-type oxidation <sup>3</sup>

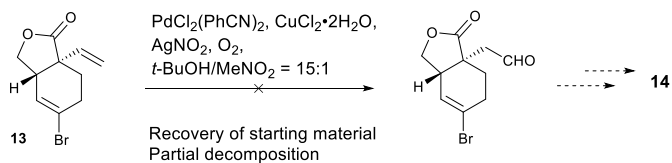

2. Reduction of the double bond of nitroalkene **15**.

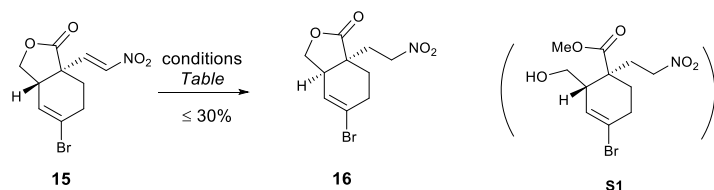

| Entry | Conditions                                            | Results                                       |
|-------|-------------------------------------------------------|-----------------------------------------------|
| 1     | NaBH <sub>4</sub> , MeOH, 0 °C to rt                  | 15% <b>16</b> + 15% <b>S1</b> + decomposition |
| 2     | NaBH <sub>4</sub> , MeOH/THF, 0 °C to rt              | 15% <b>16</b> + <b>S1</b> + decomposition     |
| 3     | NaBH <sub>4</sub> , <sup>i</sup> PrOH/DCM, 0 °C to rt | 20% <b>16</b> + decomposition                 |
| 4     | Bu <sub>3</sub> SnH, MeOH/DCM <sup>4</sup>            | decomposition                                 |
| 5     | Hantzsch ester, toluene, silica, reflux <sup>5</sup>  | No reaction                                   |
| 6     | NaBH <sub>3</sub> CN, MeOH, 0 °C                      | 25% <b>16</b> + decomposition                 |
| 7     | NaBH <sub>3</sub> CN, THF, 0 °C                       | 30% <b>16</b> + decomposition                 |
| 8     | NaBH(OAc) <sub>3</sub> , THF, 0 °C to reflux          | No reaction                                   |
| 9     | NaBH(OAc) <sub>3</sub> , MeOH, 0 °C to reflux         | Slow decomposition                            |

Note: By-product **S1** was isolated and characterised.

By-product **S1**. IR (neat)  $\nu_{\text{max}}$  3340, 2952, 1723, 1553, 1383, 1434, 1248, 1204, 1097, 1078, 1040 cm<sup>-1</sup>; <sup>1</sup>H NMR (CDCl<sub>3</sub>, 400 MHz):  $\delta$  5.93-5.88 (m, 1H), 4.69-4.61 (m, 1H), 4.41-4.31 (m, 1H), 3.72 (s, 3H), 3.66 (d, 2H, *J* = 5.9 Hz), 3.08-3.01 (m, 1H), 2.59-2.35 (m, 3H), 2.28-2.08 (m, 2H), 1.92-1.83 (m, 1H); <sup>13</sup>C NMR (CDCl<sub>3</sub>, 100 MHz):  $\delta$  175.4, 127.3, 122.5, 72.1, 62.2, 52.6, 45.5, 44.8, 32.2, 29.9, 28.9; HRMS (ESI/Q-TOF) *m/z*: [M+Na]<sup>+</sup> Calcd for C<sub>10</sub>H<sub>12</sub>BrNNaO<sub>4</sub> 322.1550; Found 322.1557.

3. Optimisation of conditions for enzymatic resolution of alcohol ( $\pm$ )-11.

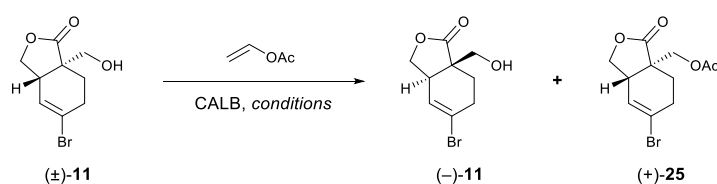

| Entry    | Solvent <sup>a</sup> | Temperature (°C) | Time (h)  | Conversion (%) <sup>b</sup> |
|----------|----------------------|------------------|-----------|-----------------------------|
| 1        | MeCN                 | 25               | 6         | trace                       |
| 2        | MeCN                 | 45               | 48        | 19                          |
| 3        | DME                  | 25               | 6         | trace                       |
| 4        | DME                  | 45               | 48        | 48                          |
| 5        | EtOAc                | 25               | 6         | 22                          |
| 6        | EtOAc                | 45               | 6         | 45                          |
| <b>7</b> | <b>EtOAc</b>         | <b>45</b>        | <b>48</b> | <b>50</b>                   |
| 8        | Acetone              | 25               | 6         | 11                          |
| 9        | Acetone              | 45               | 48        | 30                          |

*a.* concentration 1 M; *b.* Conversion was determined by crude <sup>1</sup>H NMR integrations.

4. HPLC traces

Daicel 83325 CHIRALPAK® IC normal phase chiral column, mobile phase CH<sub>2</sub>Cl<sub>2</sub>-*i*PrOH = 99:1, flow rate 1.0 mL/min,  $\lambda$  = 210 nm, retention times t<sub>R</sub>(major) = 9.9 min, t<sub>R</sub>(minor) = 10.6 min; 94.0%ee.

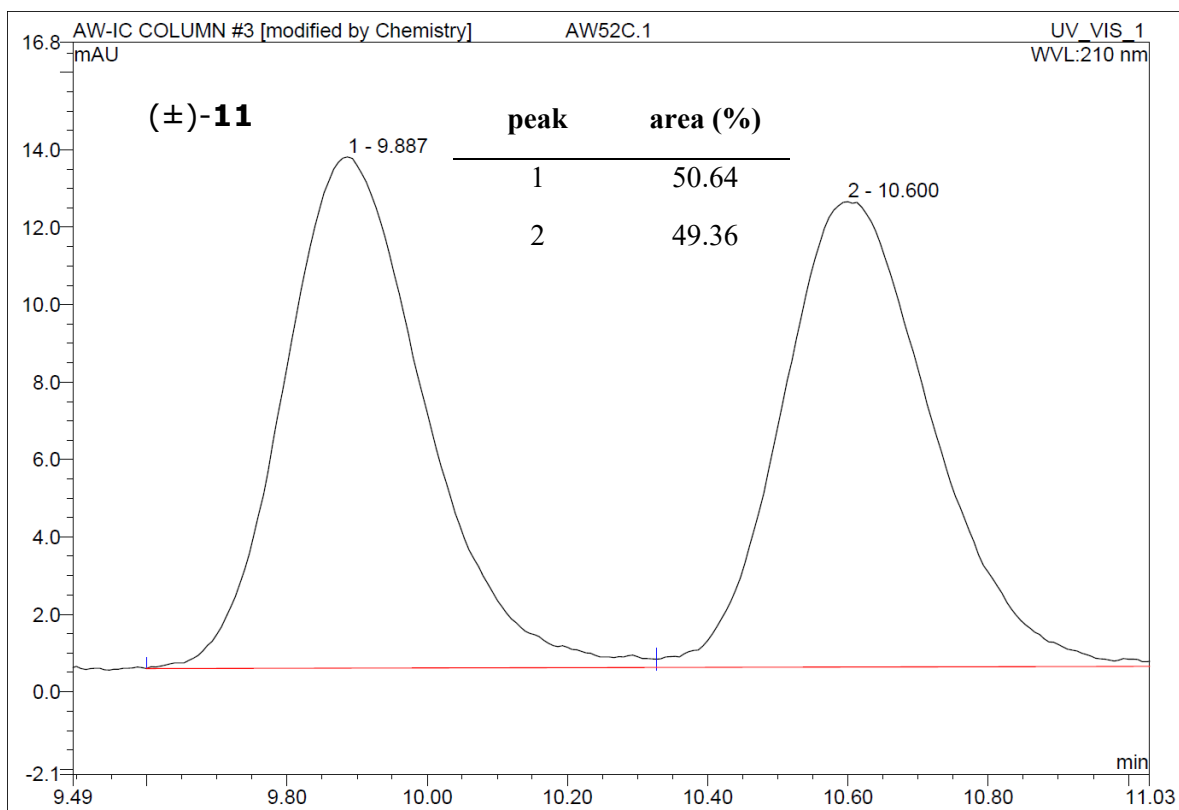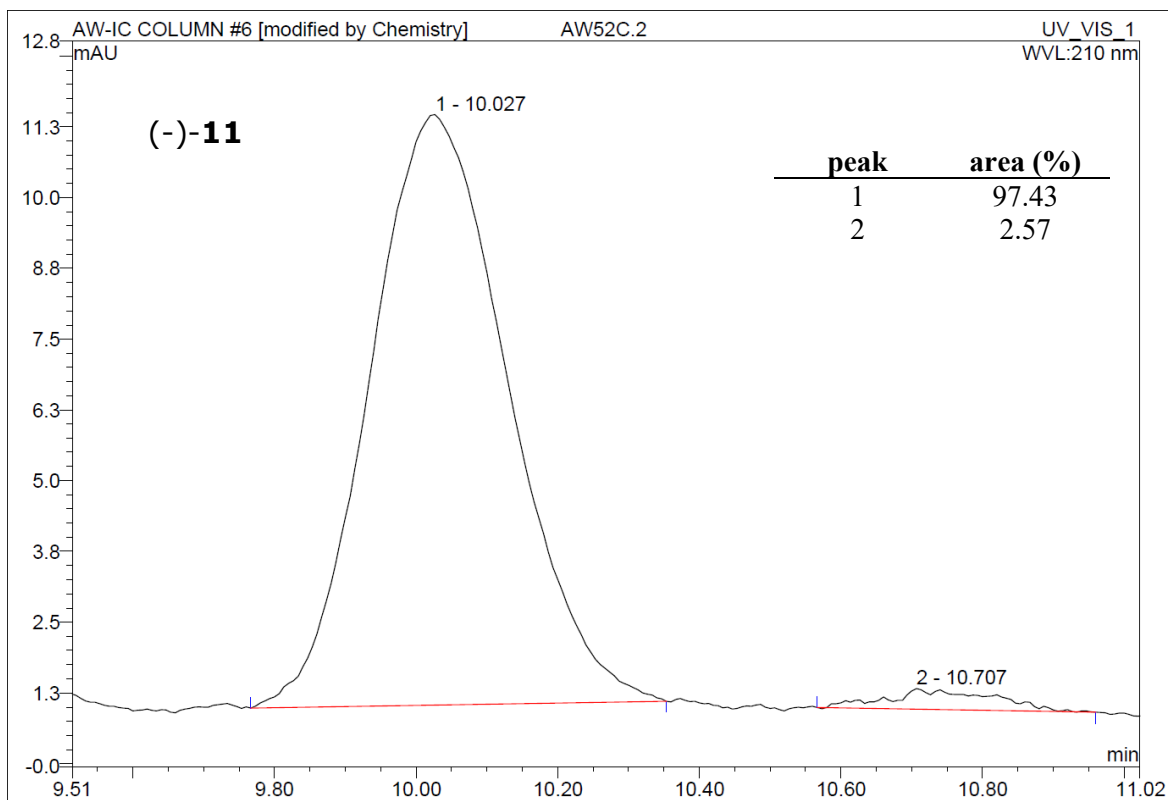

5. Crystal data and structure refinement for (-)-**11**.

The crystals suitable for X-ray analysis were prepared *via* slow evaporation of a EtOAc/petroleum ether (1:2) solution of the sample at room temperature.

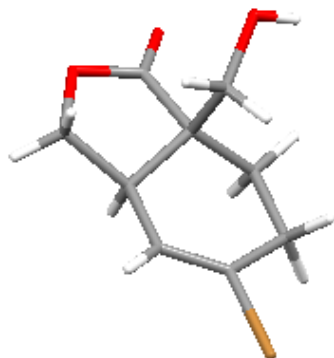

|                                 |                                                                                                                         |
|---------------------------------|-------------------------------------------------------------------------------------------------------------------------|
| Identification code             | shelx                                                                                                                   |
| Empirical formula               | C <sub>9</sub> H <sub>10</sub> Br O <sub>3</sub>                                                                        |
| Formula weight                  | 246.08                                                                                                                  |
| Temperature                     | 373(2) K                                                                                                                |
| Wavelength                      | 1.54184 Å                                                                                                               |
| Crystal system, space group     | Monoclinic, P 2 <sub>1</sub>                                                                                            |
| Unit cell dimensions            | a = 7.6869(2) Å    alpha = 90 deg.<br>b = 5.97800(10) Å    beta = 95.575(2) deg.<br>c = 10.0410(2) Å    gamma = 90 deg. |
| Volume                          | 459.224(17) Å <sup>3</sup>                                                                                              |
| Z, Calculated density           | 2, 1.780 Mg/m <sup>3</sup>                                                                                              |
| Absorption coefficient          | 5.892 mm <sup>-1</sup>                                                                                                  |
| F(000)                          | 246                                                                                                                     |
| Crystal size                    | 0.200 x 0.160 x 0.100 mm                                                                                                |
| Theta range for data collection | 5.783 to 68.153 deg.                                                                                                    |
| Limiting indices                | -8<=h<=9, -7<=k<=7, -11<=l<=12                                                                                          |
| Reflections collected / unique  | 4287 / 1634 [R(int) = 0.0168]                                                                                           |
| Completeness to theta = 67.684  | 97.9 %                                                                                                                  |
| Refinement method               | Full-matrix least-squares on F <sup>2</sup>                                                                             |
| Data / restraints / parameters  | 1634 / 1 / 120                                                                                                          |

Goodness-of-fit on  $F^2$       0.977  
Final R indices [ $I > 2\sigma(I)$ ]     $R_1 = 0.0167$ ,  $wR_2 = 0.0447$   
R indices (all data)             $R_1 = 0.0168$ ,  $wR_2 = 0.0447$   
Absolute structure parameter     $-0.027(15)$   
Extinction coefficient           $0.0029(4)$   
Largest diff. peak and hole     $0.274$  and  $-0.244 \text{ e.Å}^{-3}$

## 6. NMR Spectra

**10**,  $^1\text{H}$  NMR ( $\text{CD}_3\text{OD}$ , 400 MHz)

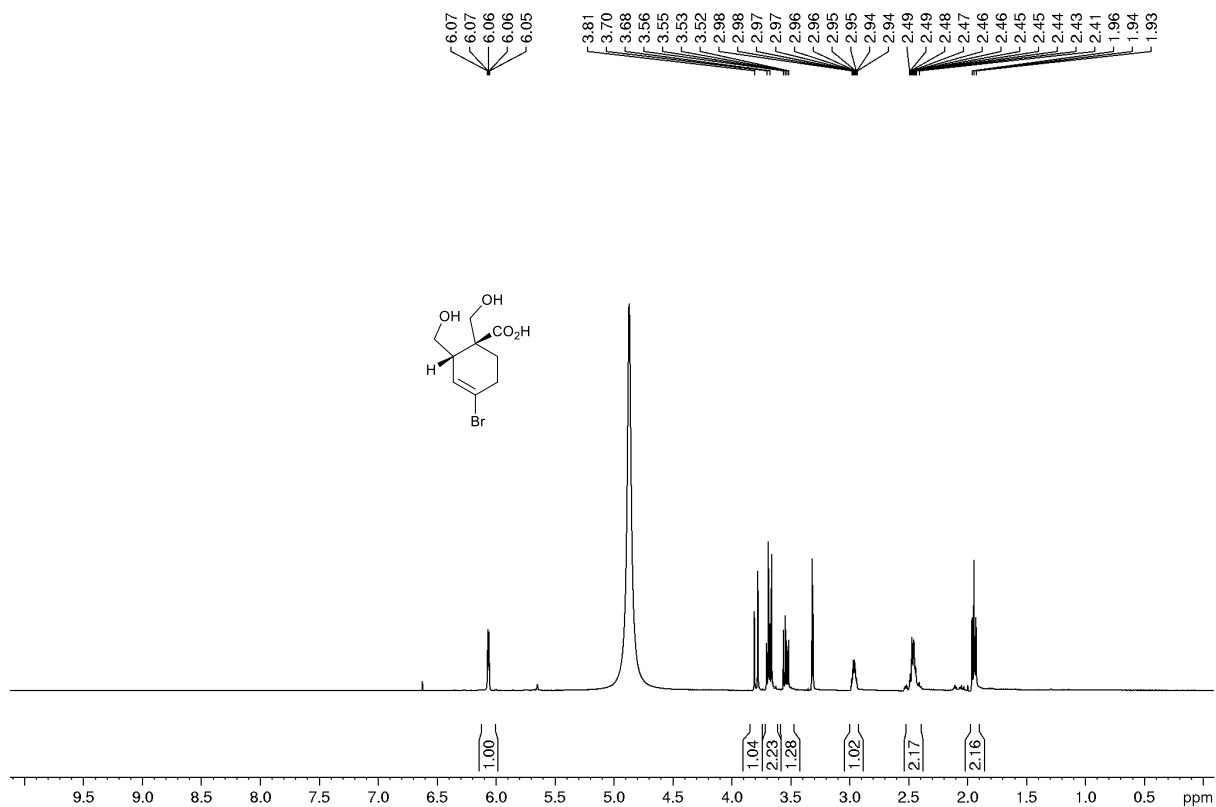

**10**,  $^{13}\text{C}$   $\{^1\text{H}\}$  NMR ( $\text{CD}_3\text{OD}$ , 100 MHz)

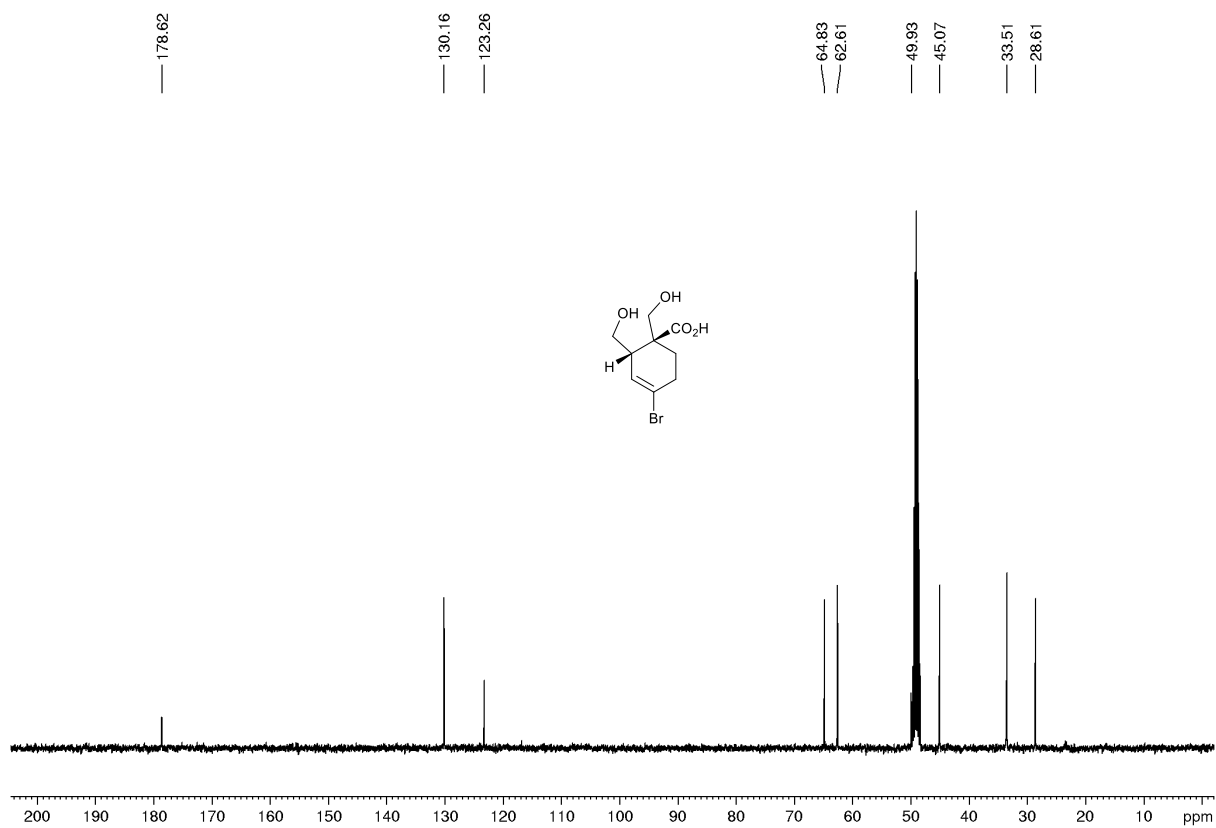



**11**,  $^1\text{H}$  NMR ( $\text{CDCl}_3$ , 400 MHz)

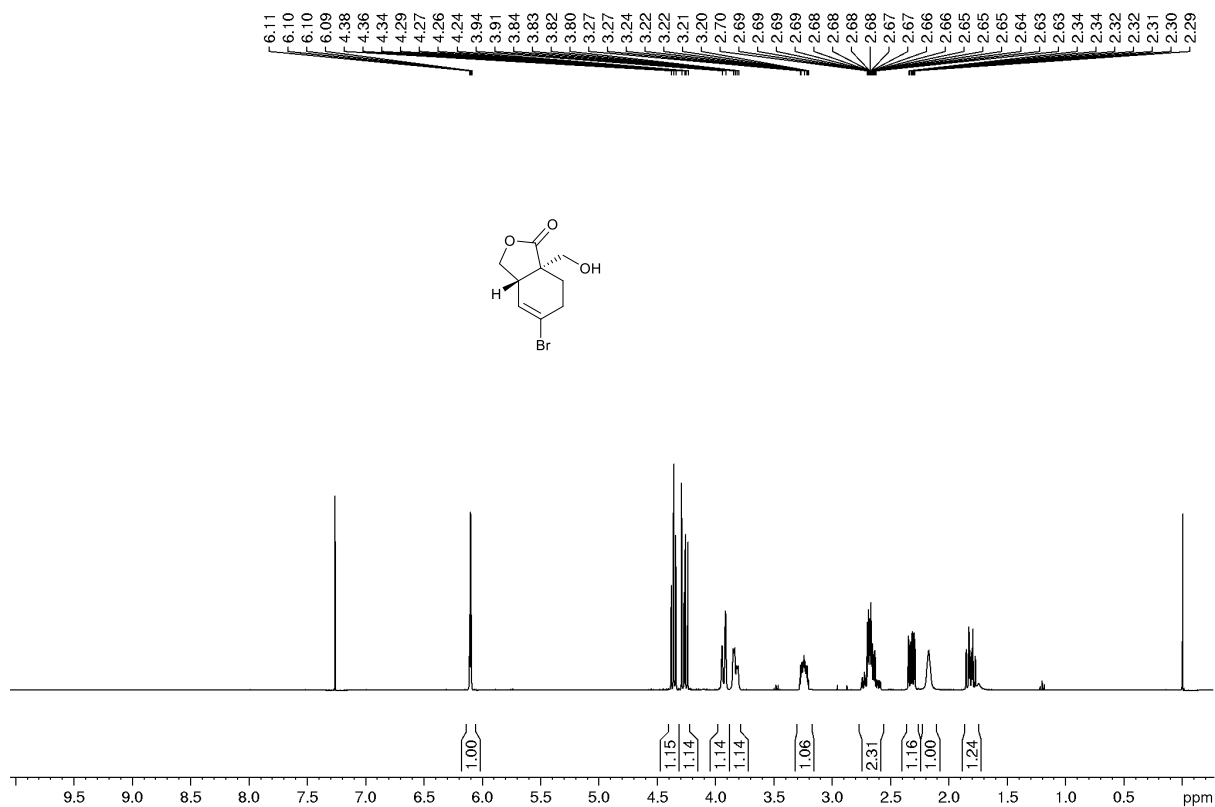

**11**,  $^{13}\text{C}$   $\{^1\text{H}\}$  NMR ( $\text{CDCl}_3$ , 100 MHz)

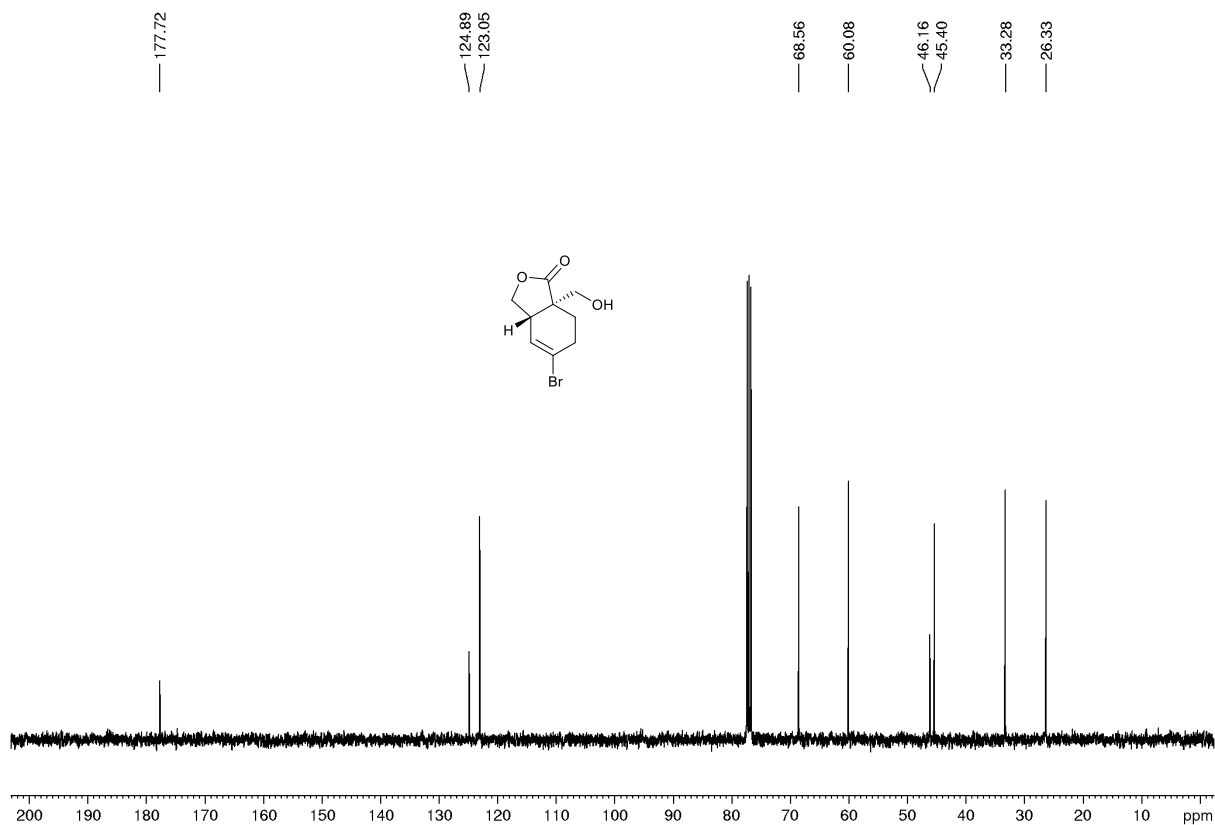

**12**,  $^1\text{H}$  NMR ( $\text{CDCl}_3$ , 400 MHz)

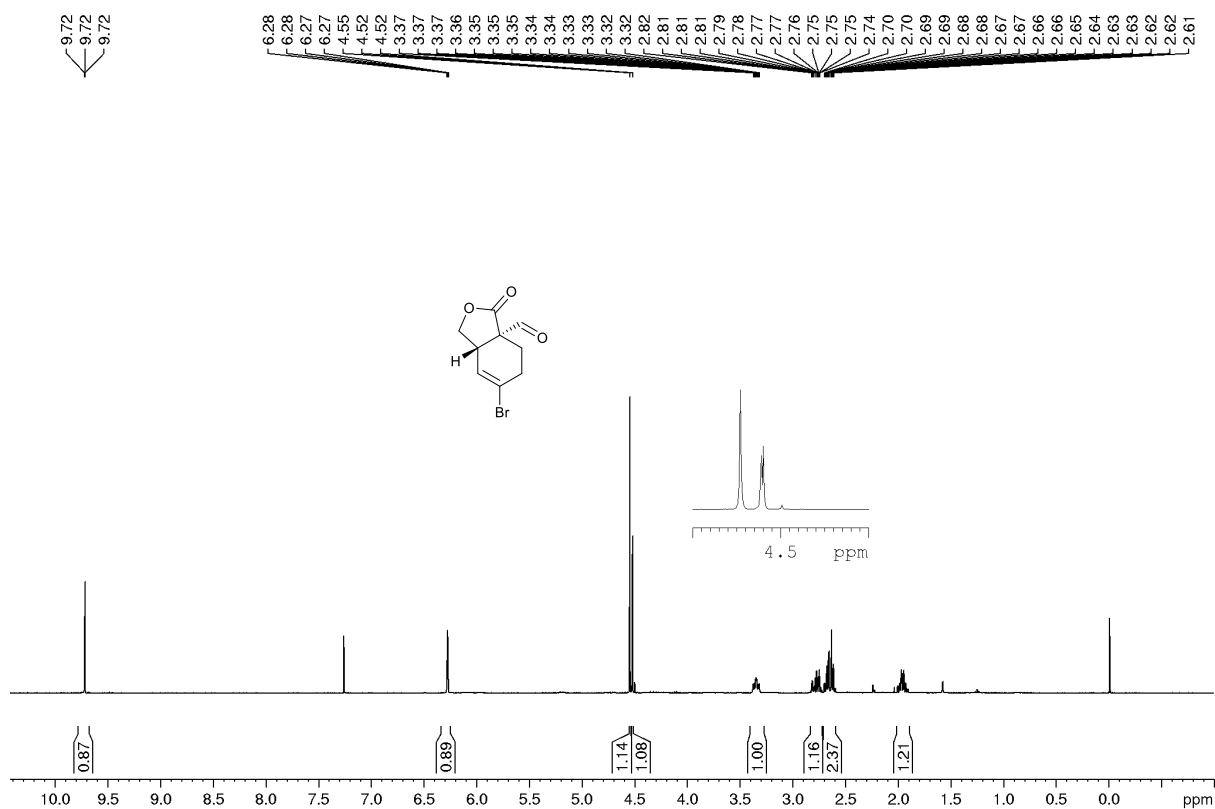

**12**,  $^{13}\text{C}$   $\{^1\text{H}\}$  NMR ( $\text{CDCl}_3$ , 100 MHz)

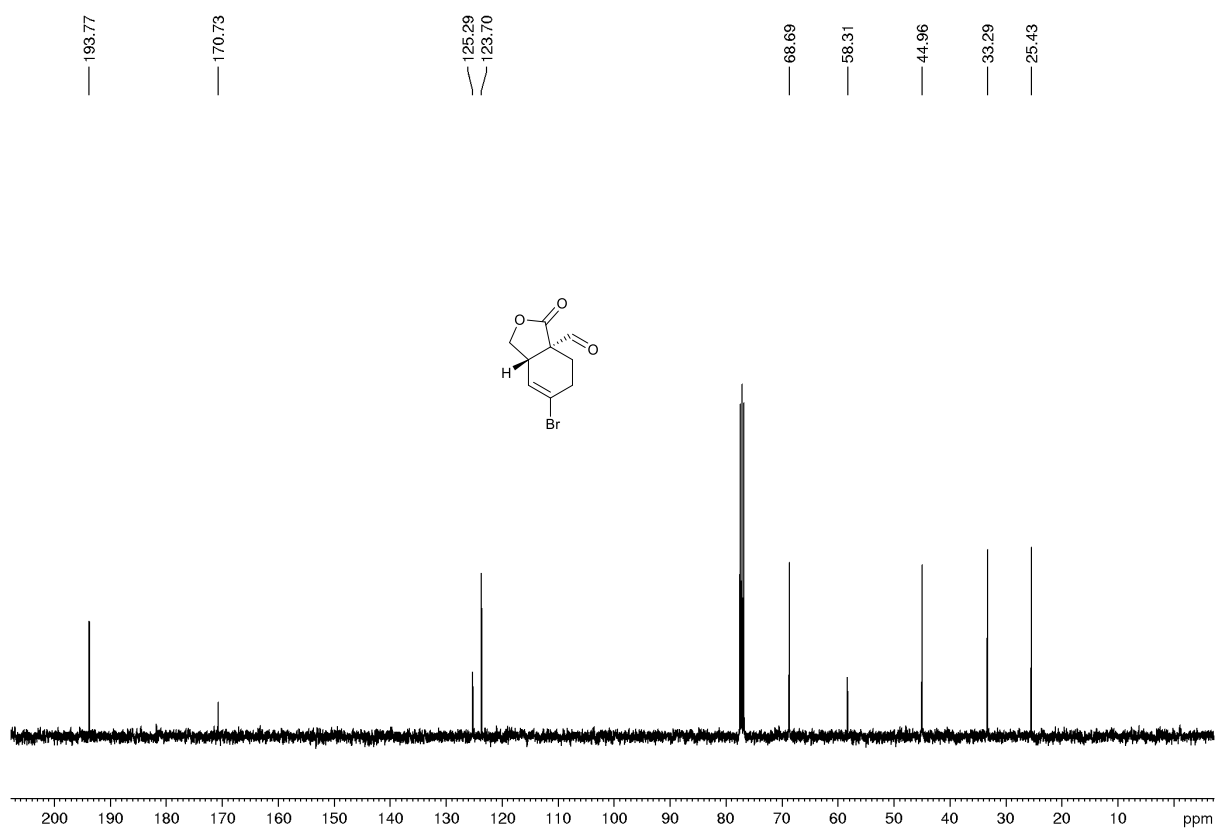

13, <sup>1</sup>H NMR (CDCl<sub>3</sub>, 400 MHz)

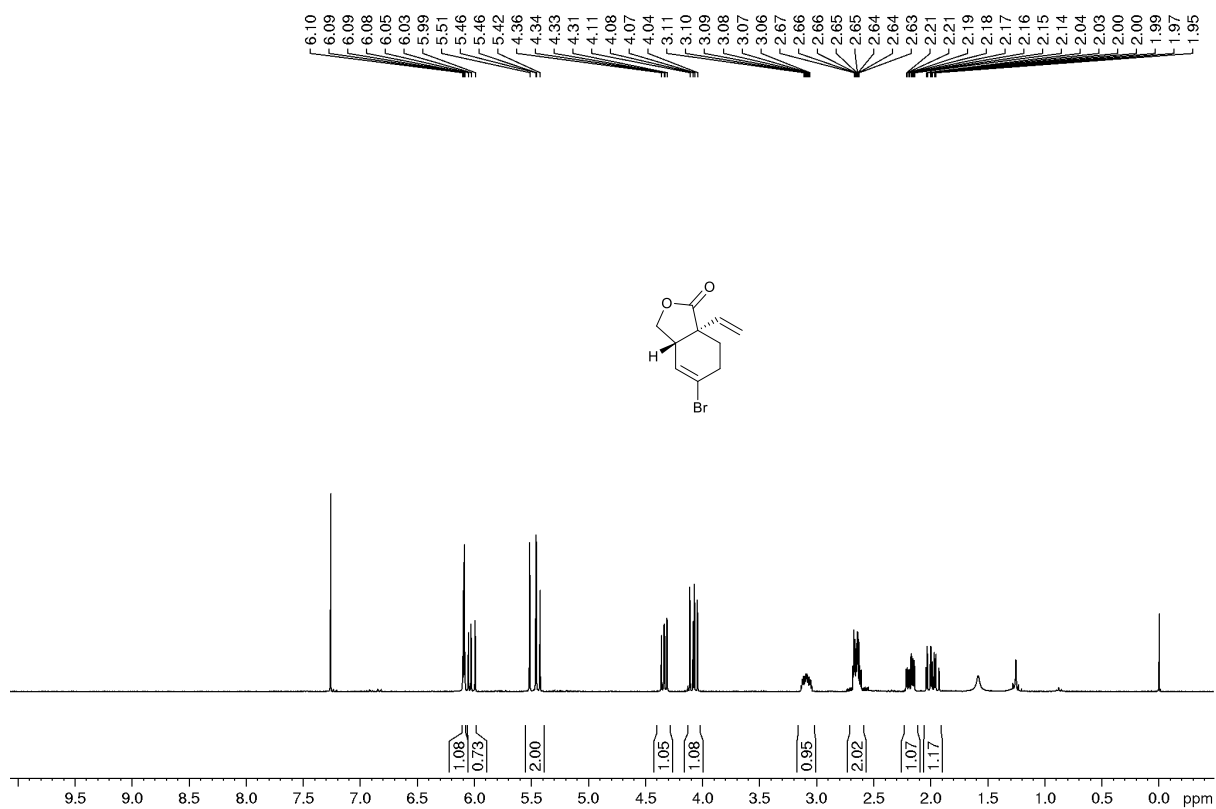

13, <sup>13</sup>C {<sup>1</sup>H} NMR (CDCl<sub>3</sub>, 100 MHz)

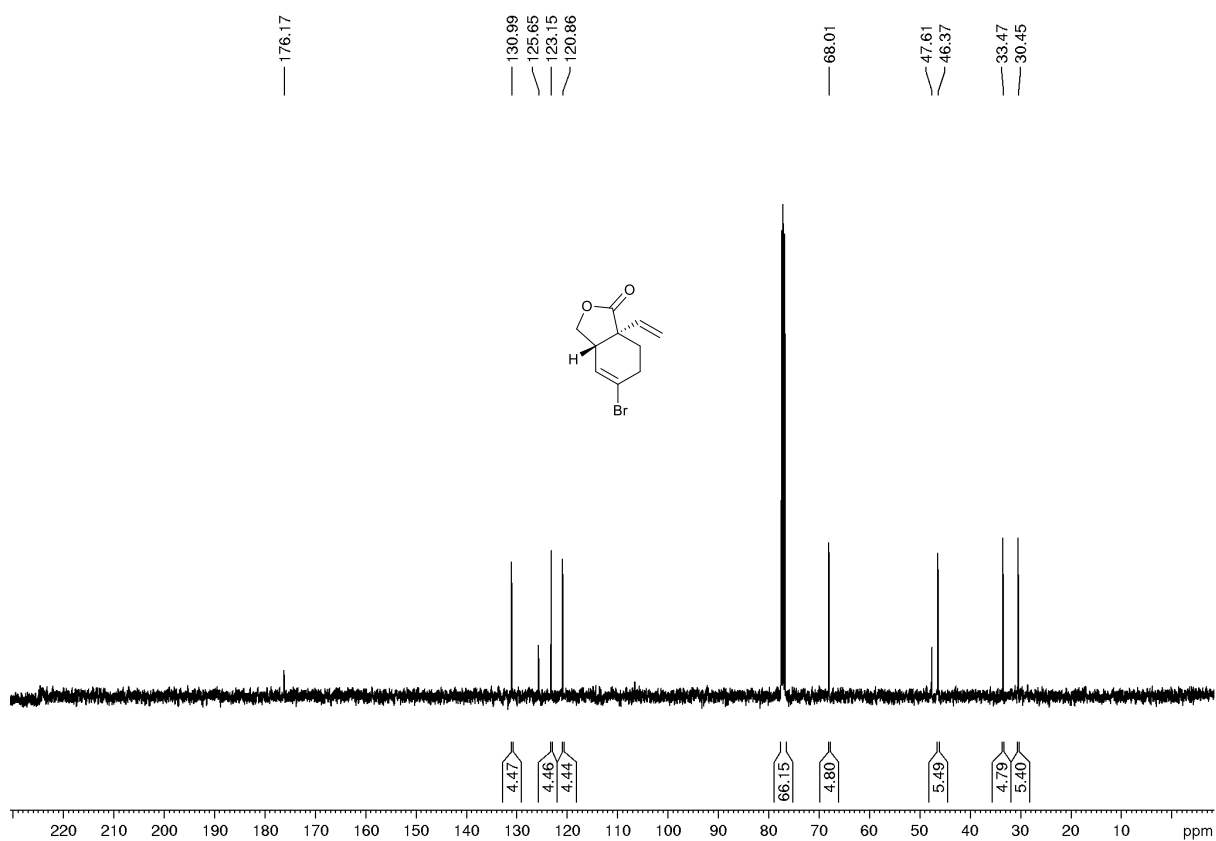

15,  $^1\text{H}$  NMR ( $\text{CDCl}_3$ , 400 MHz)

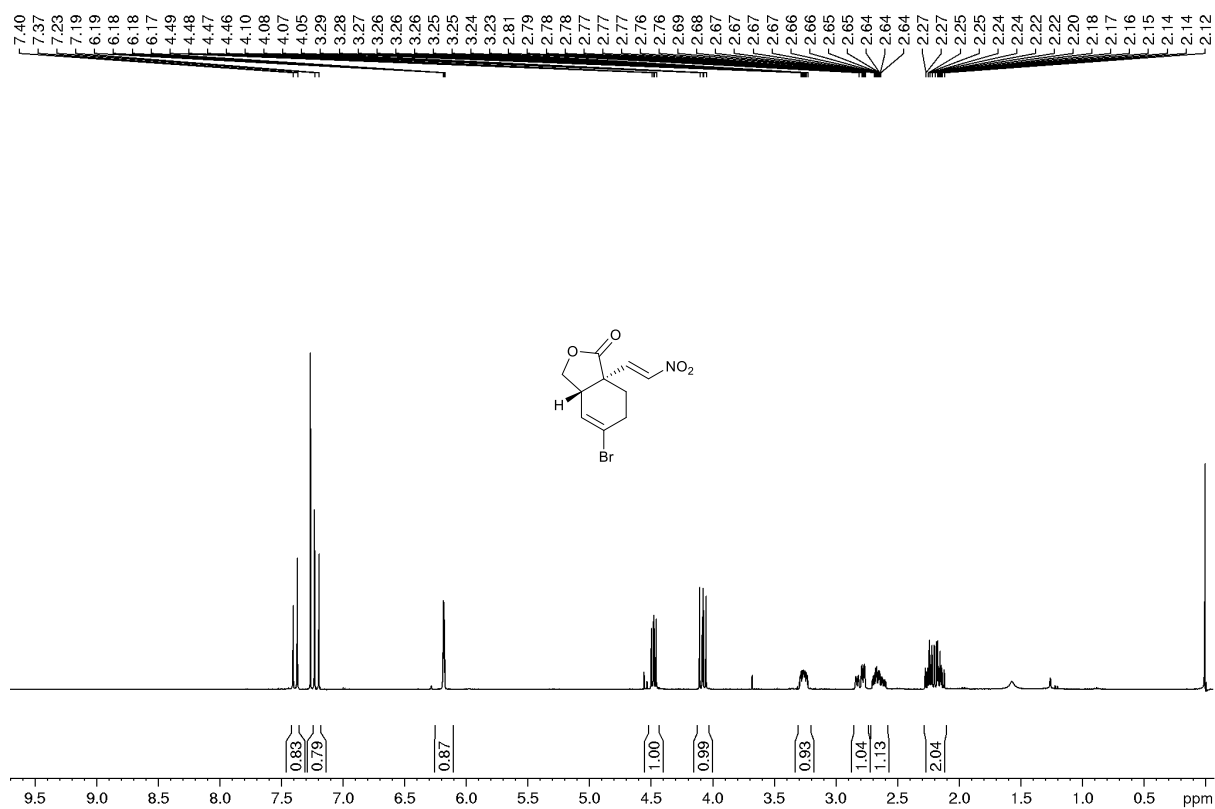

15,  $^{13}\text{C}$  { $^1\text{H}$ } NMR ( $\text{CDCl}_3$ , 100 MHz)

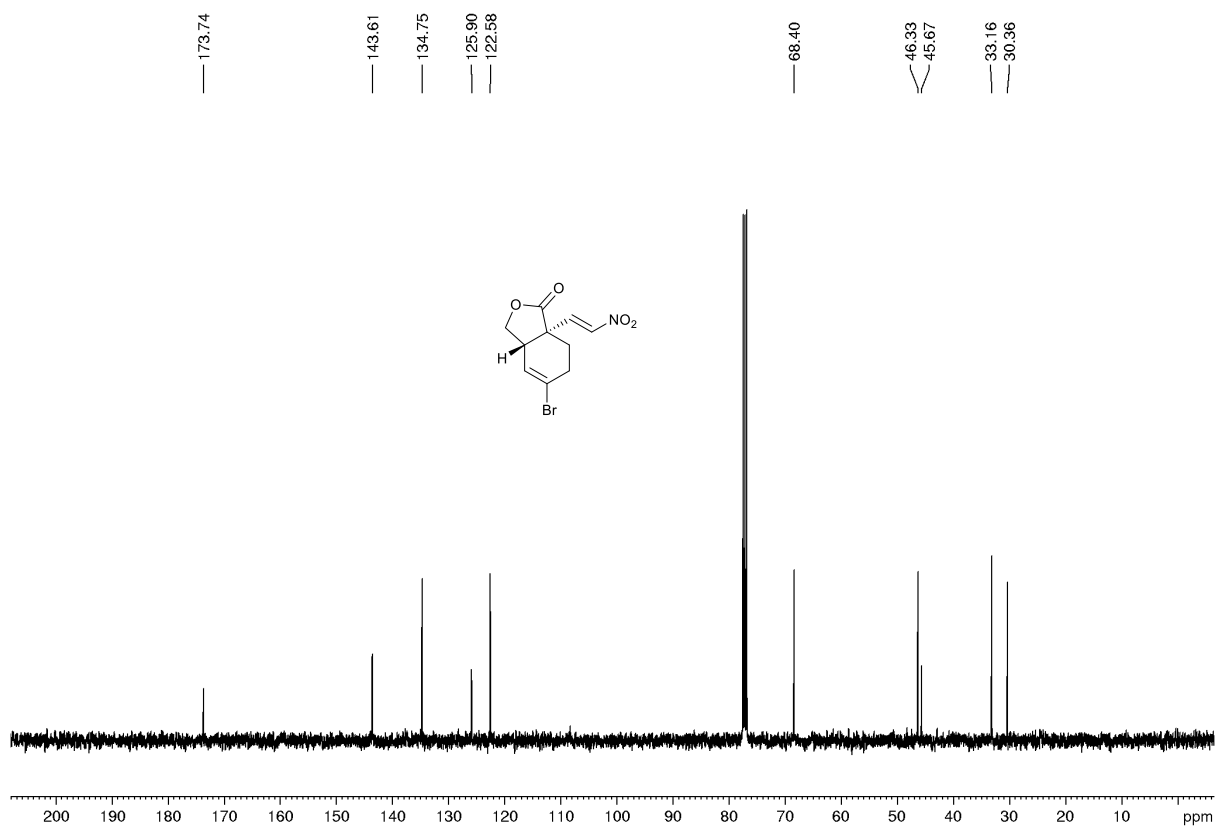



S1, <sup>1</sup>H NMR (CDCl<sub>3</sub>, 400 MHz)

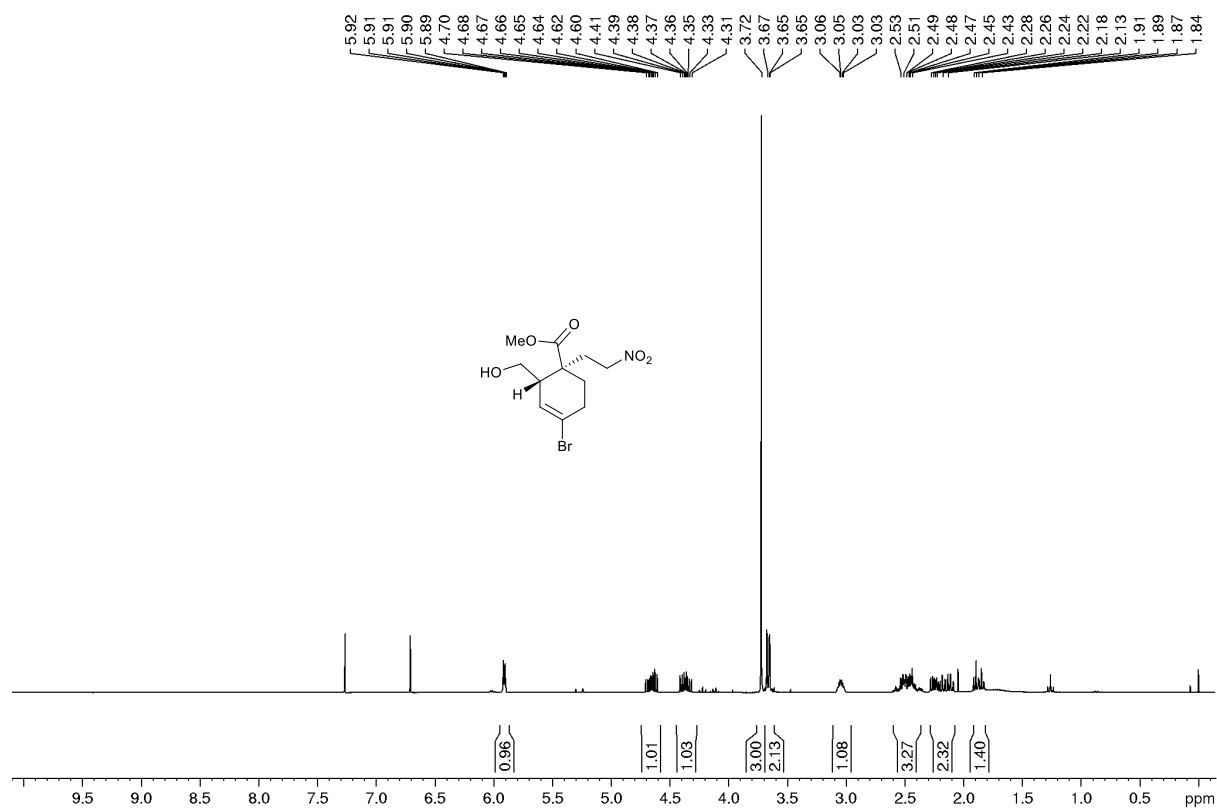

S1, <sup>13</sup>C {<sup>1</sup>H} NMR (CDCl<sub>3</sub>, 100 MHz)

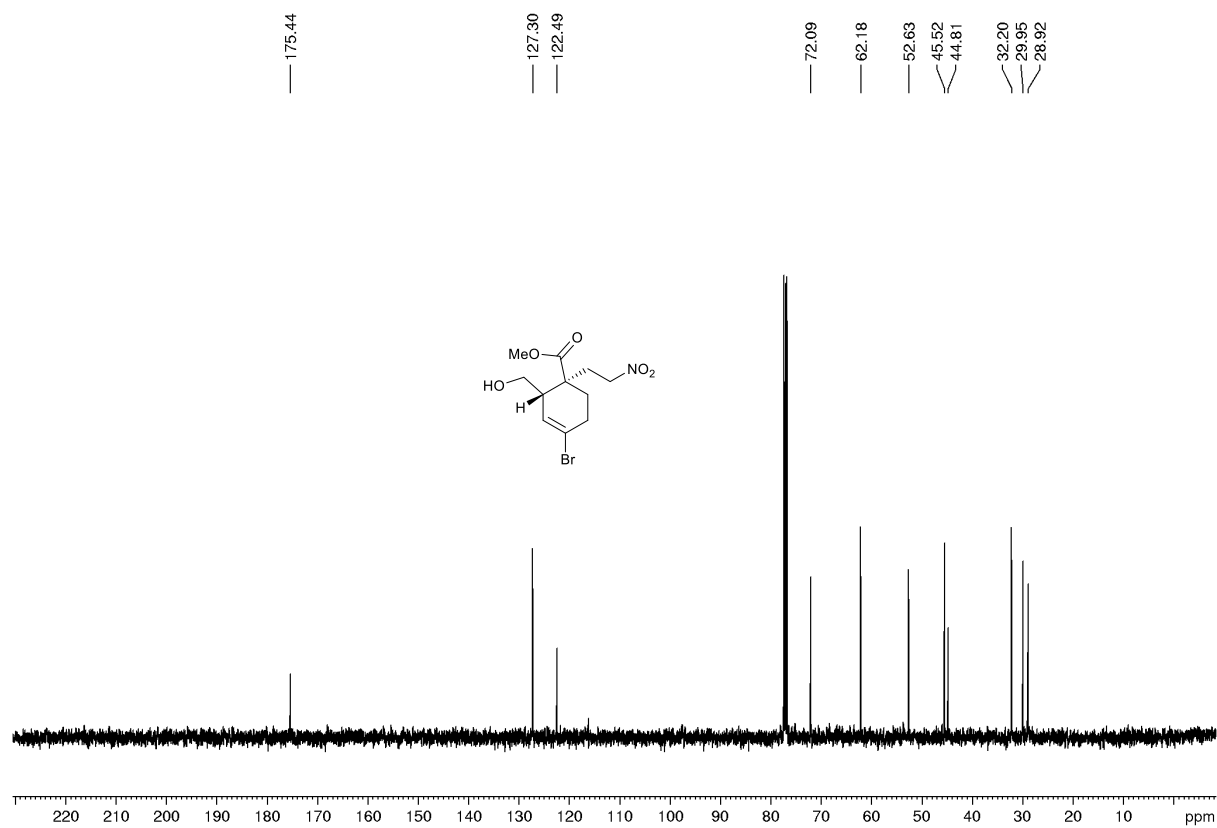

17,  $^1\text{H}$  NMR ( $\text{CDCl}_3$ , 400 MHz)

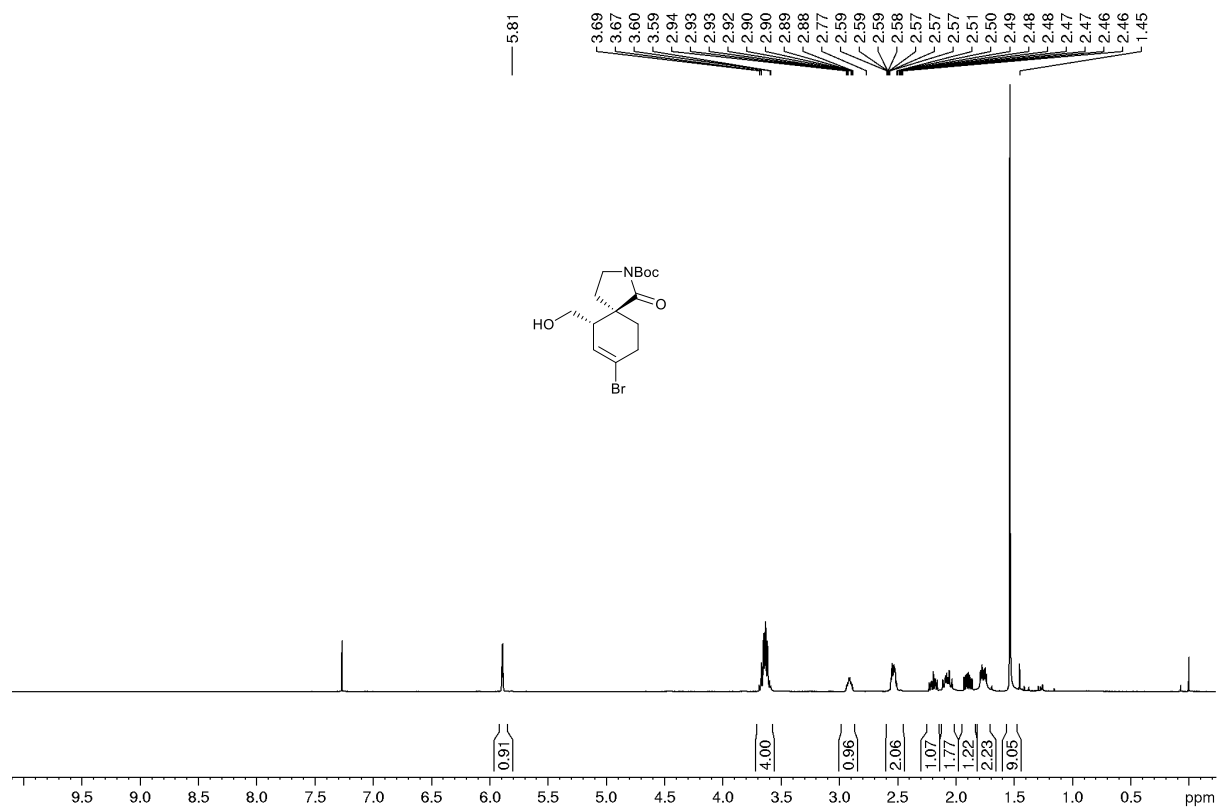

17,  $^{13}\text{C}$  { $^1\text{H}$ } NMR ( $\text{CDCl}_3$ , 100 MHz)

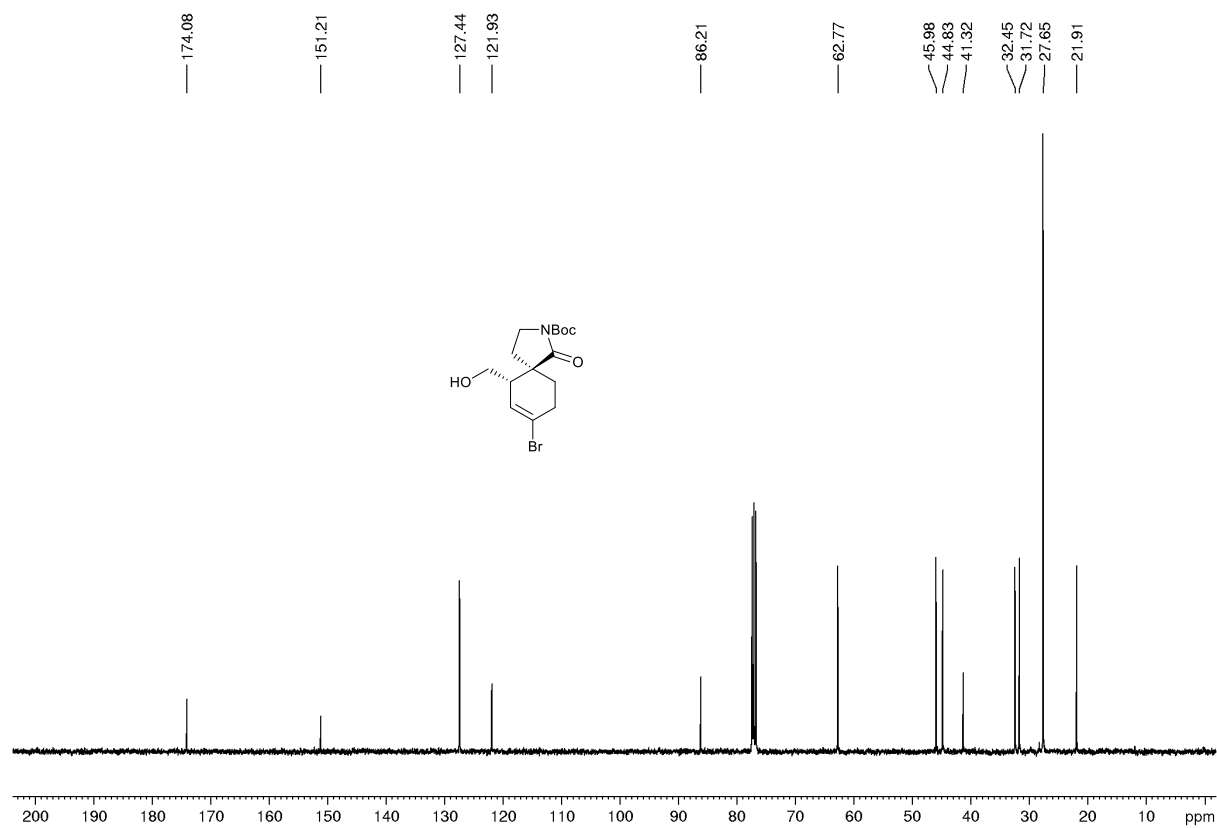

20,  $^1\text{H}$  NMR ( $\text{CDCl}_3$ , 400 MHz)

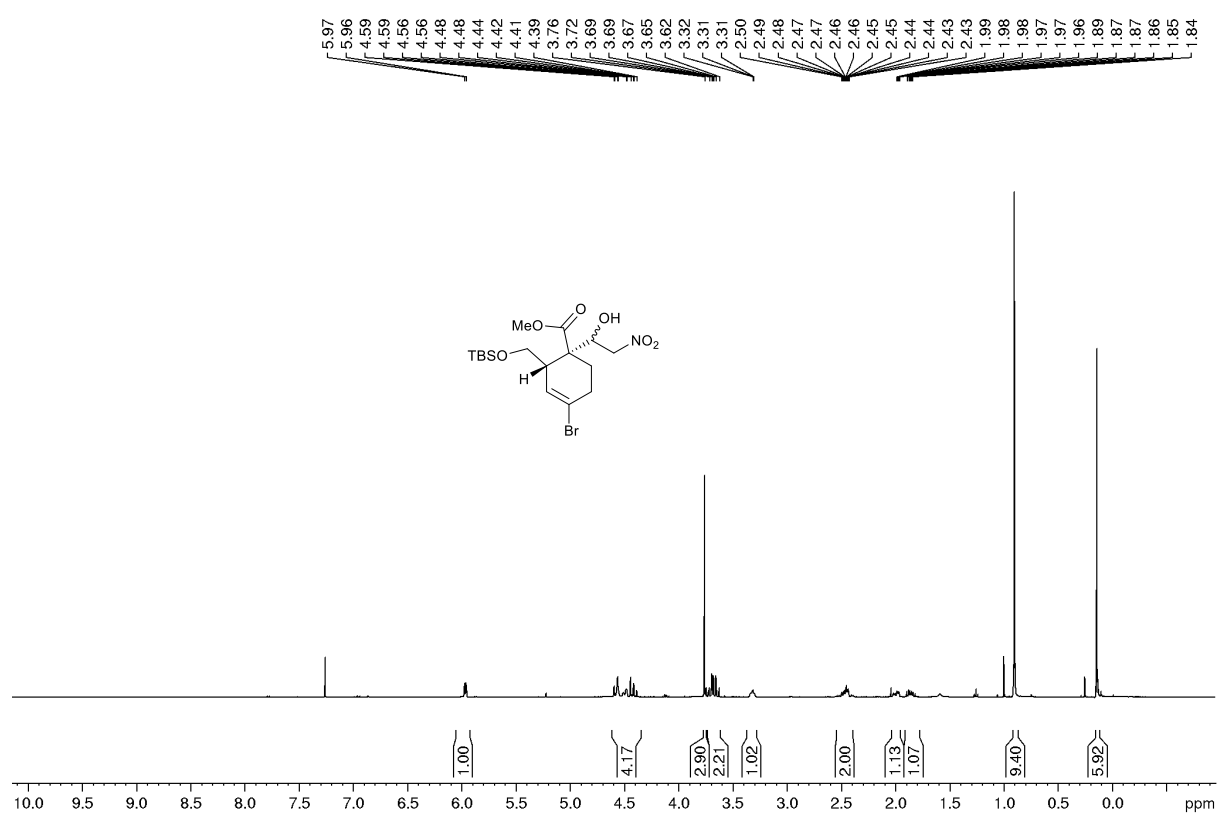

20,  $^{13}\text{C}$   $\{^1\text{H}\}$  NMR ( $\text{CDCl}_3$ , 100 MHz)

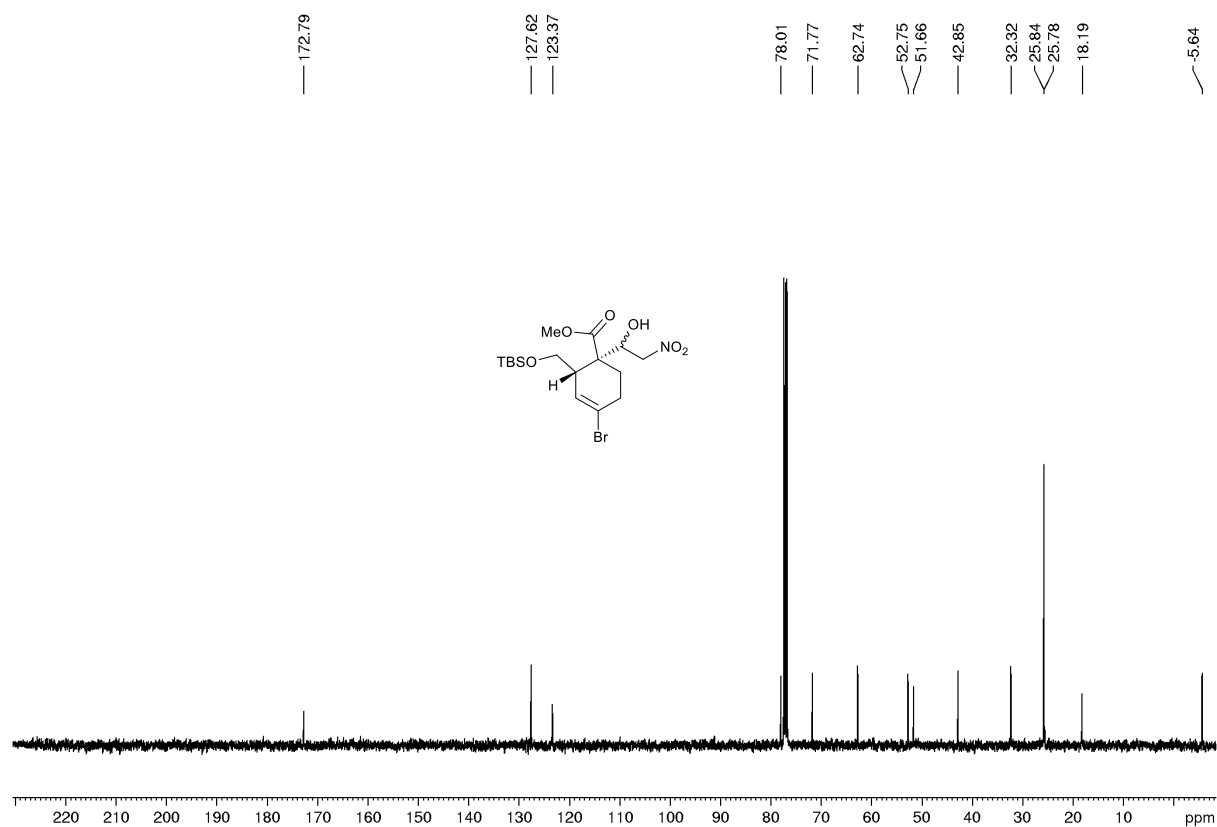



21, <sup>1</sup>H NMR (CDCl<sub>3</sub>, 400 MHz)

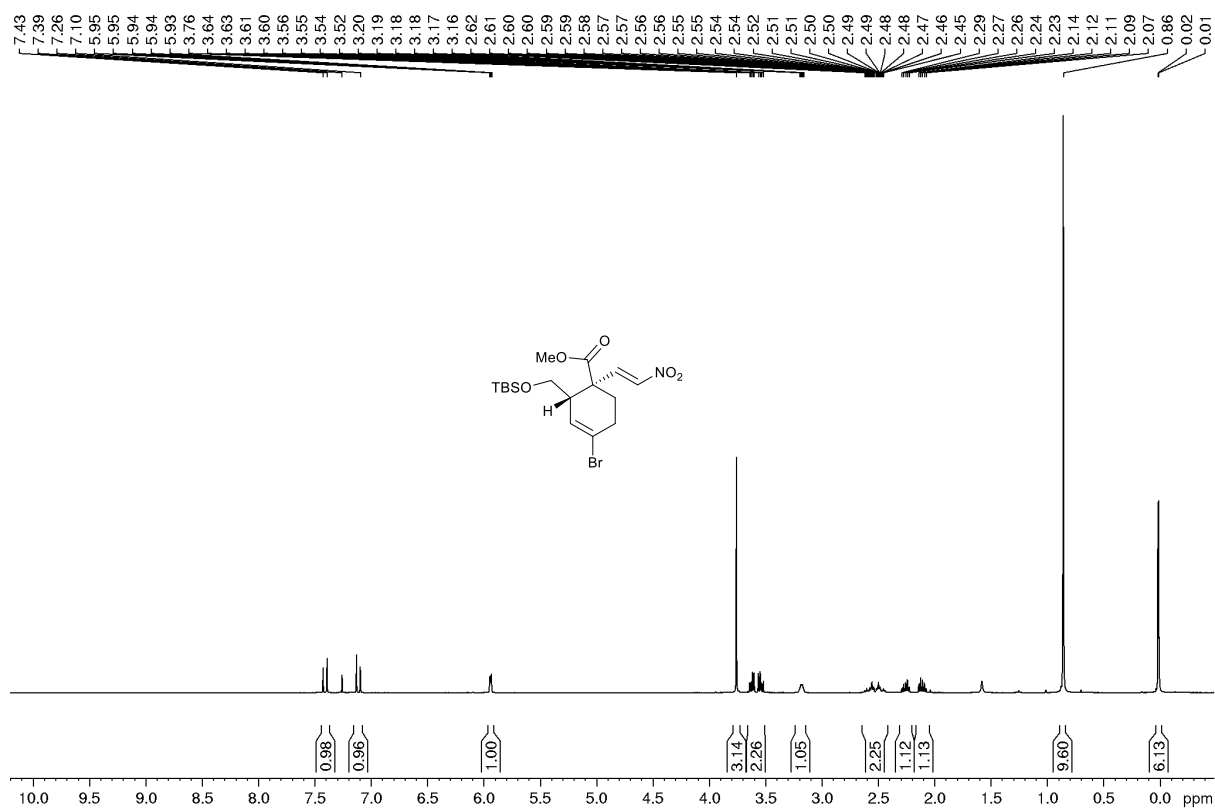

21, <sup>13</sup>C {<sup>1</sup>H} NMR (CDCl<sub>3</sub>, 100 MHz)

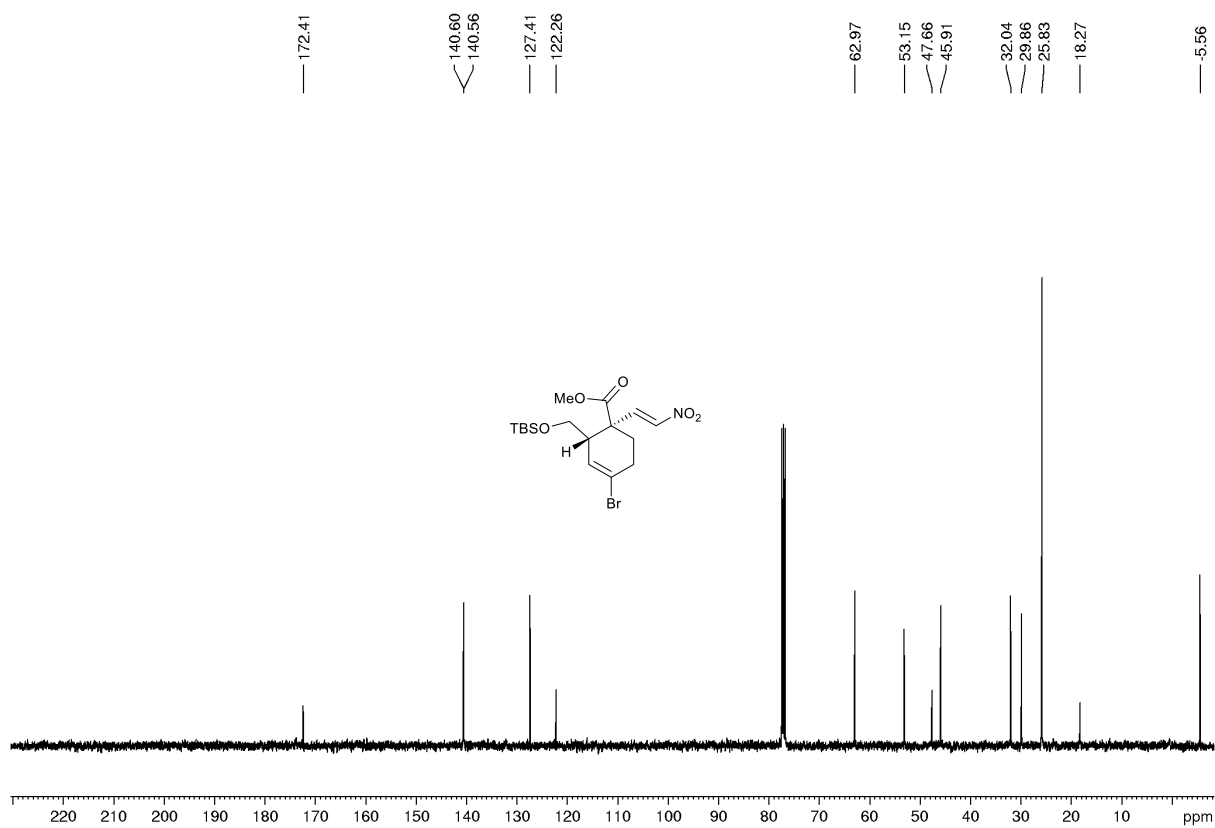





**24a**,  $^1\text{H}$  NMR ( $\text{CDCl}_3$ , 400 MHz)

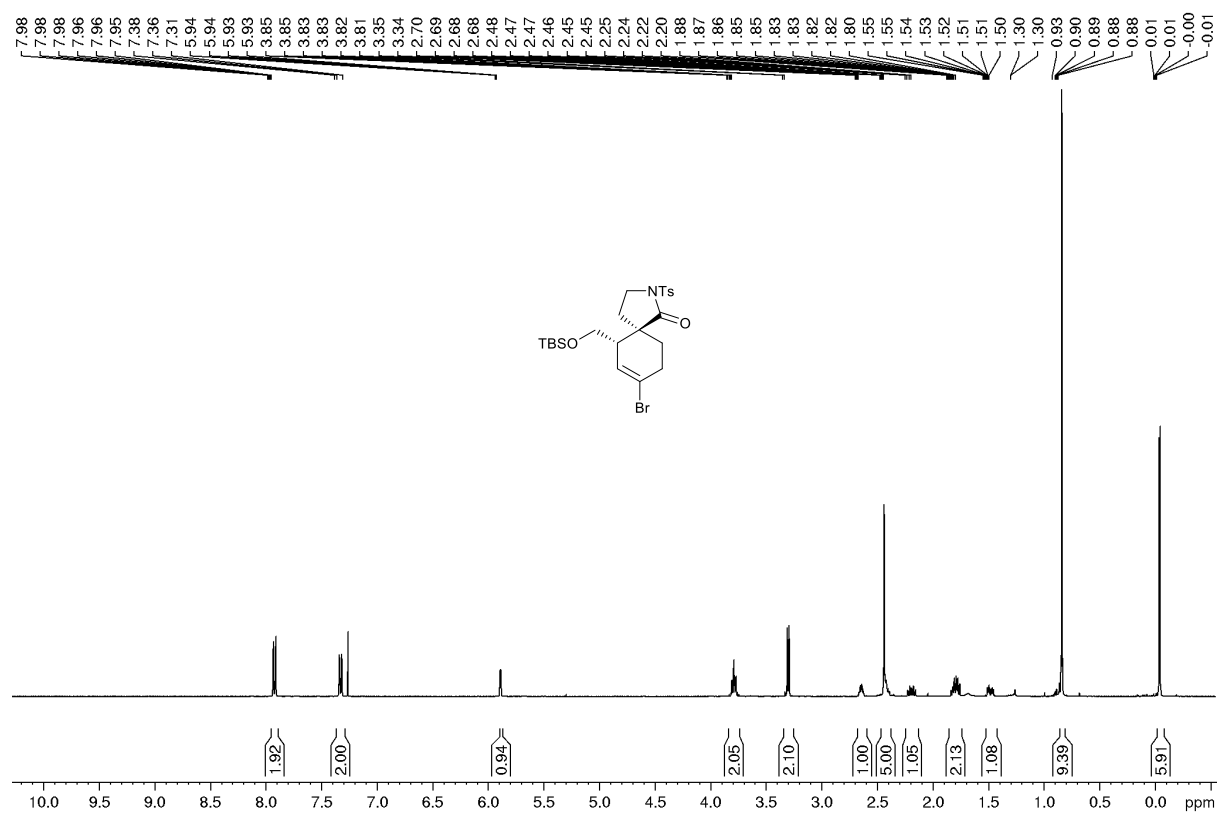

**24a**,  $^{13}\text{C}$   $\{^1\text{H}\}$  NMR ( $\text{CDCl}_3$ , 100 MHz)

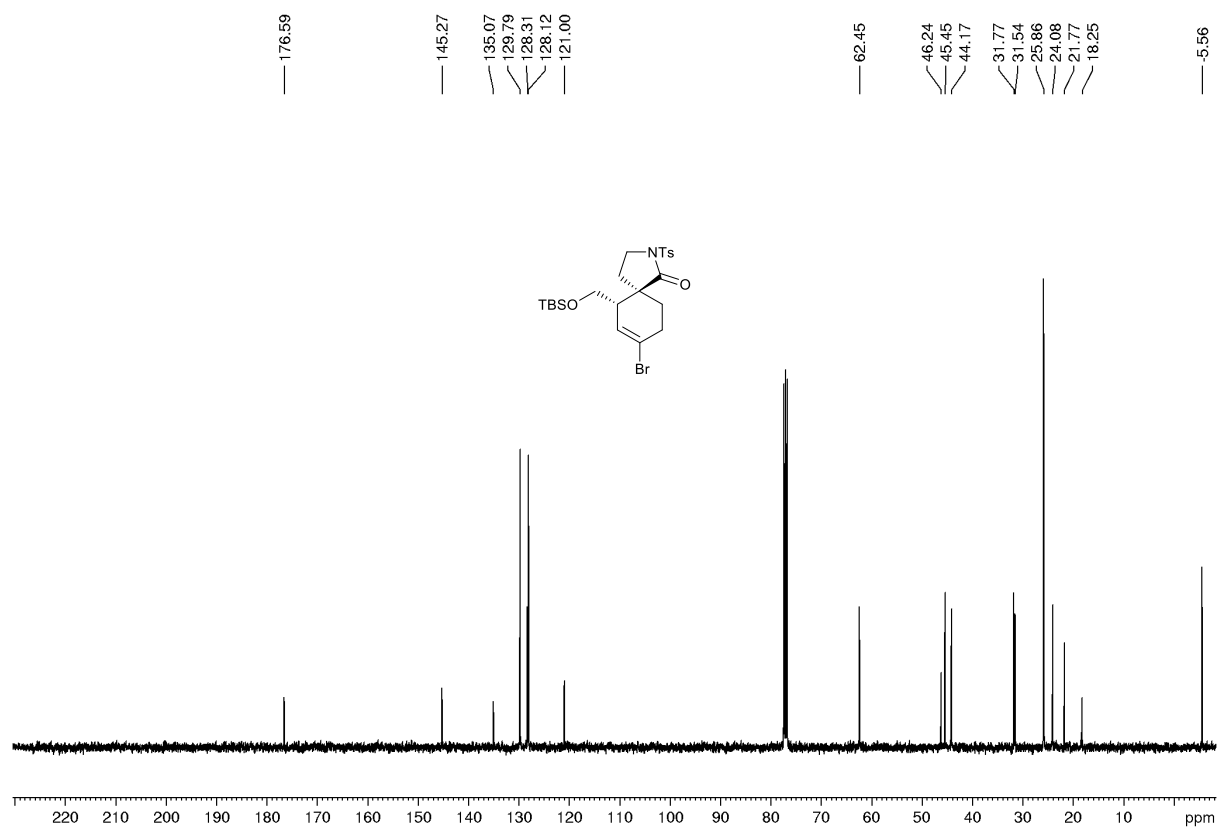



**24b**,  $^1\text{H}$  NMR ( $\text{CDCl}_3$ , 400 MHz)

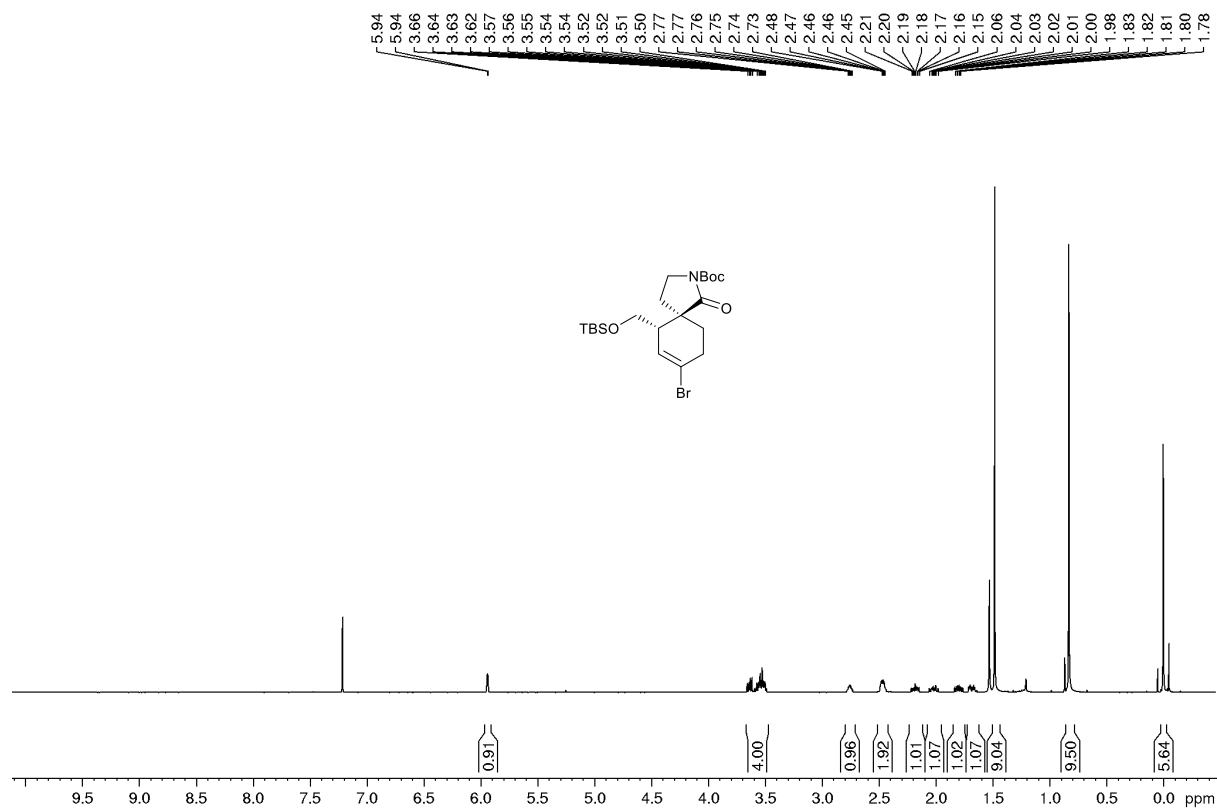

**24b**,  $^{13}\text{C}$   $\{^1\text{H}\}$  NMR ( $\text{CDCl}_3$ , 100 MHz)

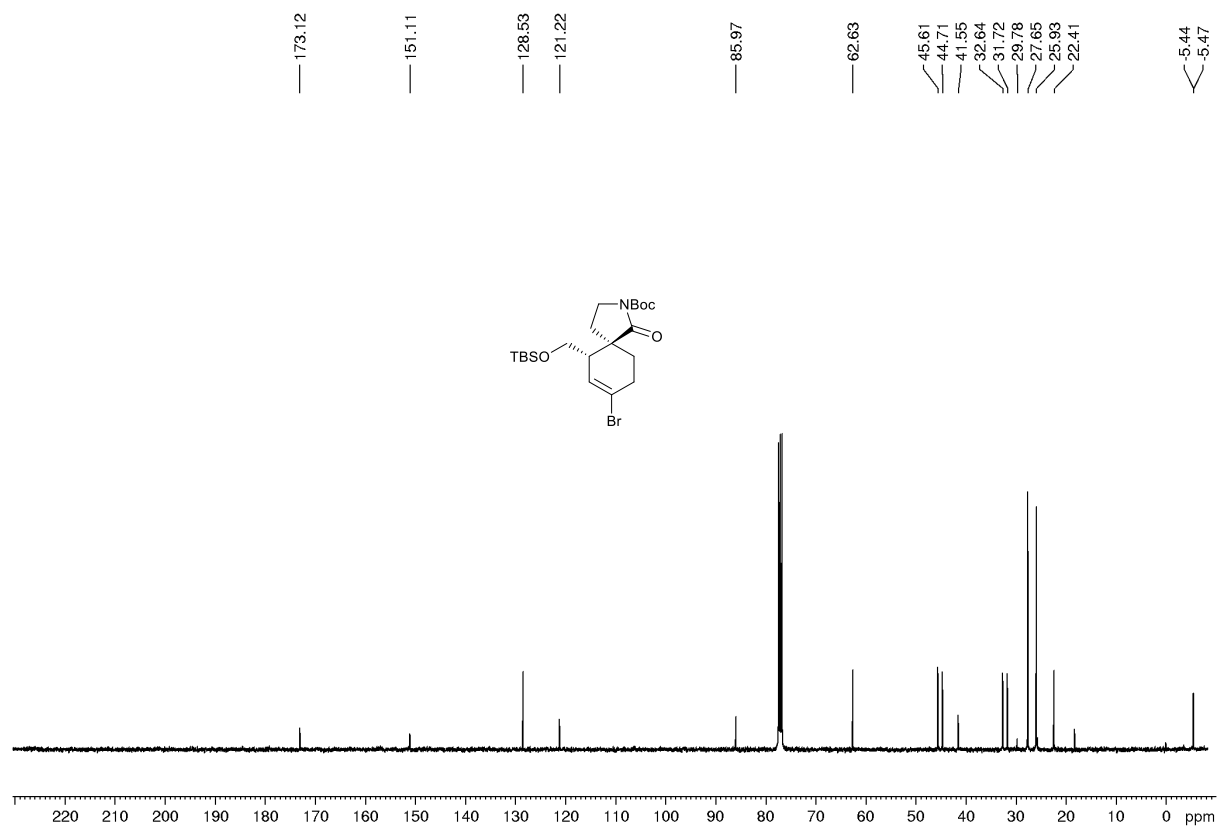

**5b**,  $^1\text{H}$  NMR ( $\text{CDCl}_3$ , 400 MHz)

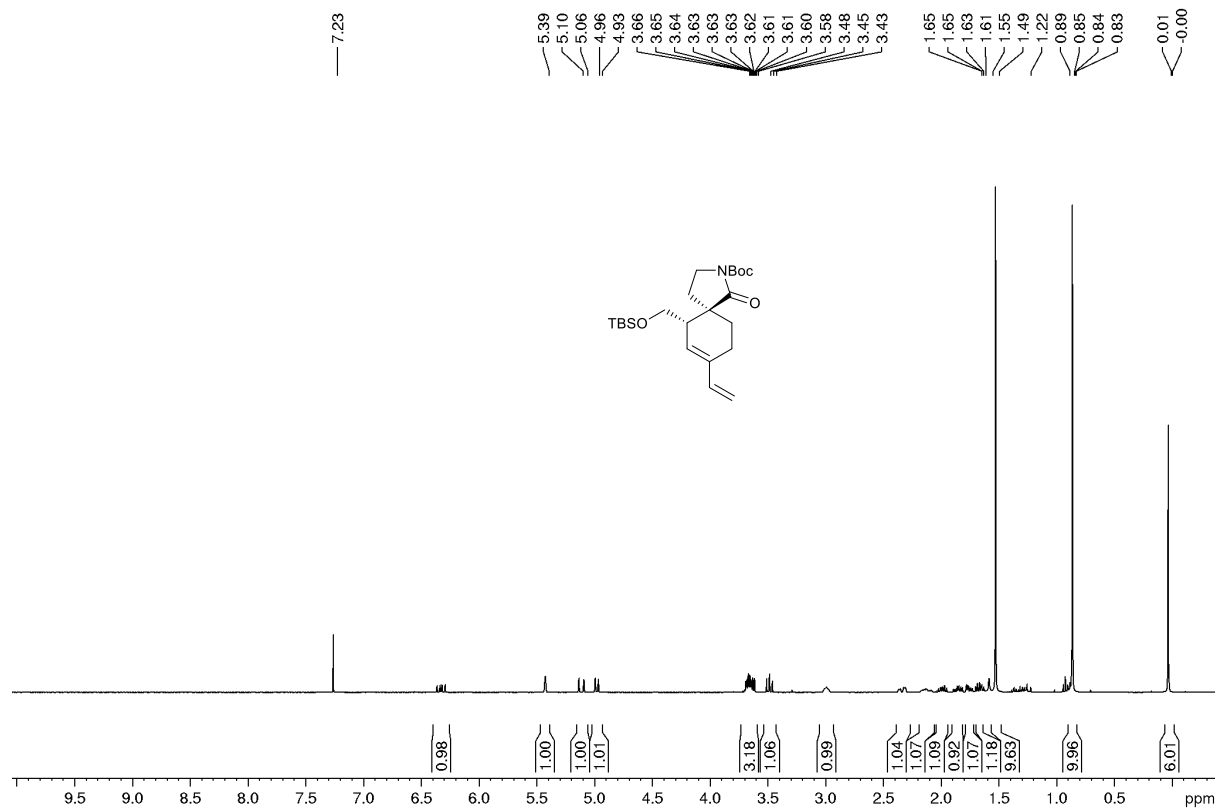

**5b**,  $^{13}\text{C}$  { $^1\text{H}$ } NMR ( $\text{CDCl}_3$ , 100 MHz)

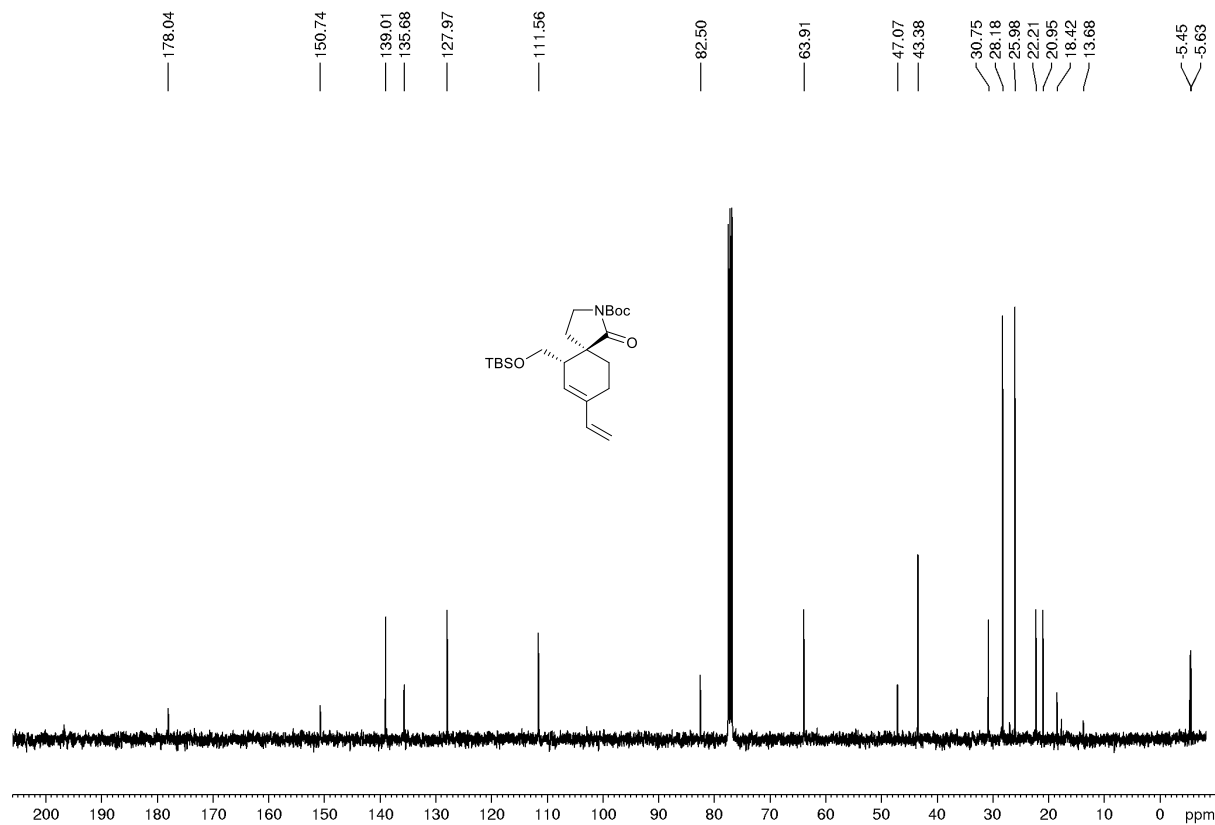

25,  $^1\text{H}$  NMR ( $\text{CDCl}_3$ , 400 MHz)

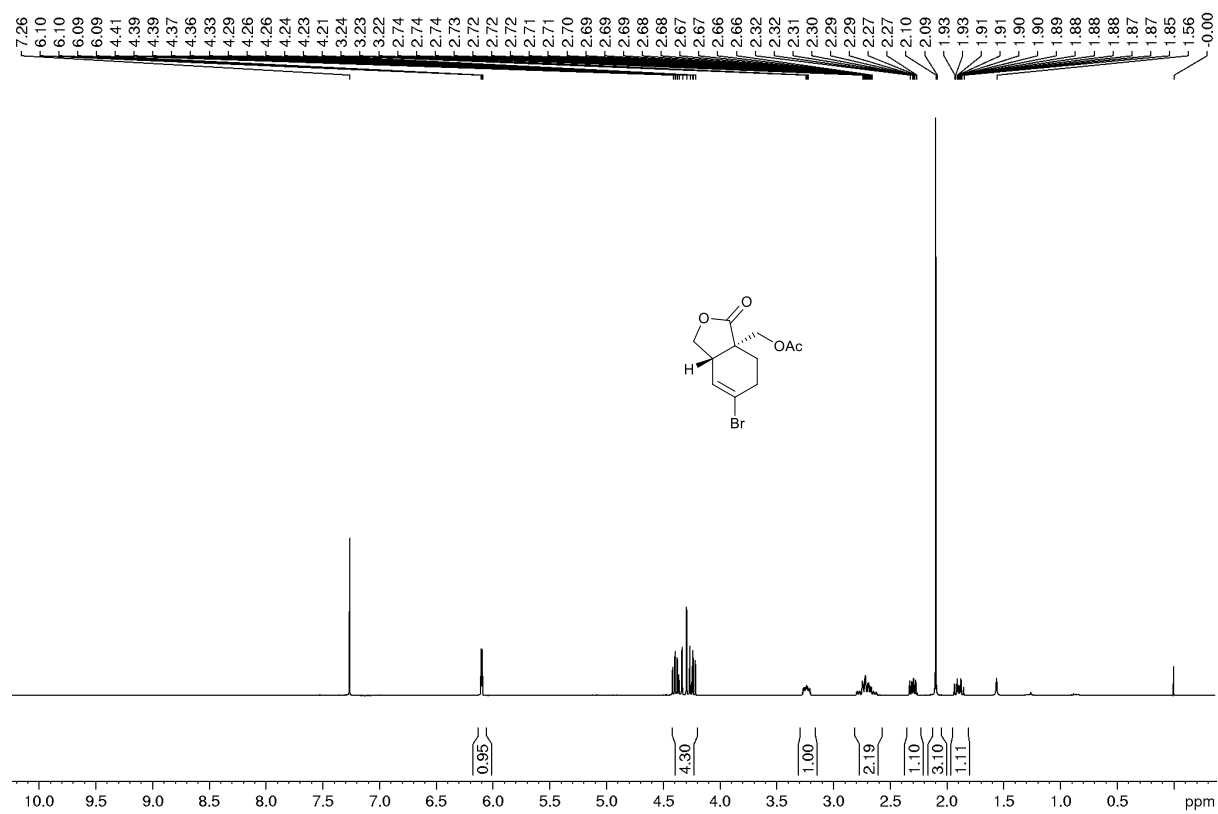

25,  $^{13}\text{C}$  { $^1\text{H}$ } NMR ( $\text{CDCl}_3$ , 100 MHz)

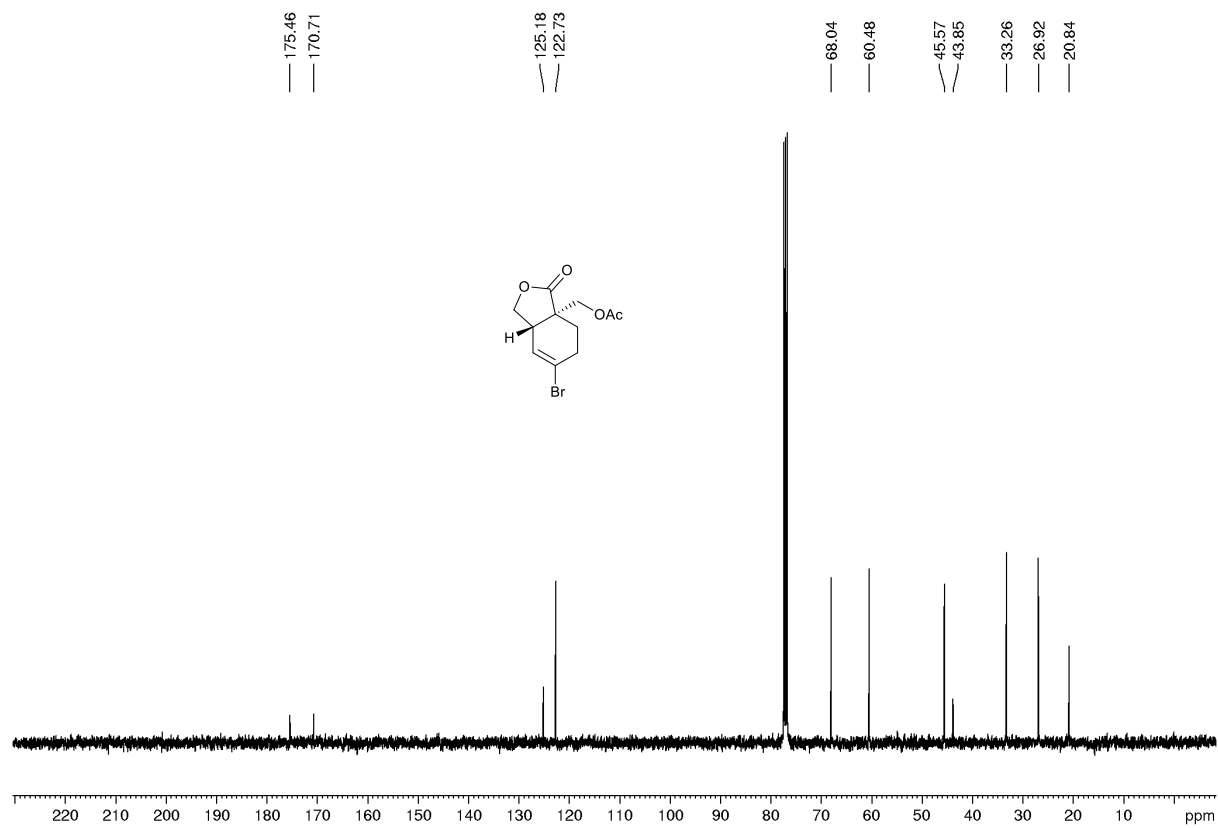



## References

1. A. E. Strom, J. F. Hartwig, *J. Org. Chem.* **2013**, *78*, 8909.
2. K. E. Kim, J. Li, R. H. Grubbs, B. M. Stoltz, *J. Am. Chem. Soc.* **2016**, *138*, 13179.
3. H. C. Brown, W. R. Heydkamp, E. Breuer, W. S. Murphy, *J. Am. Chem. Soc.* **1964**, *86*, 3565.
4. C. Palomo, J. M. Aizpurua, F. P. Cossio, J. M. Garcia, M. C. Lopez and M. Oiarbide, *J. Org. Chem.* **1990**, *55*, 2070–2078.
5. M. Node, H. Nagasawa, Y. Naniwa and K. Fuji, *Synthesis* **1987**, 729-32.
